# Supplementary material for: Carbon Nanotubes Hybrid Hydrogels for Environmental Remediation: Evaluation of Adsorption Efficiency under Electric Field
Source: MDPI journal article supplement (doi:10.3390/molecules26227001), 2021-11-19
Supplement: s1 [file s1]

## Supplementary Materials

# Carbon Nanotubes hybrid hydrogels for environmental remediation: evaluation of adsorption efficiency under electric field

Giuseppe Cirillo<sup>1,\*</sup>, Manuela Curcio<sup>1</sup>, Lorenzo Francesco Madeo<sup>2</sup>, Francesca Iemma<sup>1</sup>, Giovanni De Filpo<sup>3</sup>, Silke Hampel<sup>2</sup> and Fiore Pasquale Nicoletta<sup>1</sup>

<sup>1</sup> Department of Pharmacy, Health and Nutritional Sciences, University of Calabria, 87036 Rende (CS), Italy

<sup>2</sup> Leibniz Institute of Solid State and Material Research Dresden, 01069 Dresden, Germany

<sup>3</sup> Department of Chemistry and Chemical Technologies, University of Calabria, 87036 Rende (CS), Italy

\* Correspondence: giuseppe.cirillo@unical.it; Tel.: +39 0984493208

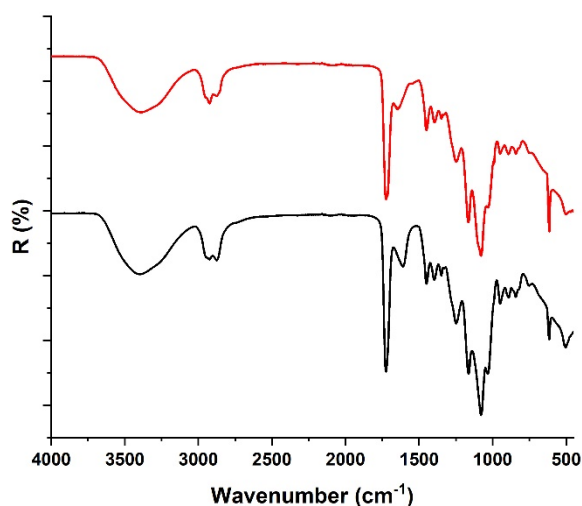

**Figure S1.** FT-IR of HG<sub>NT</sub> samples before (black line) and after (red line) the five sorption cycles.

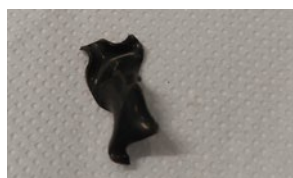

(a)

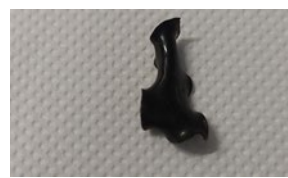

(b)

**Figure S2.** Surface appearance of HG<sub>NT</sub> (a) before and (b) after the five sorption cycles.

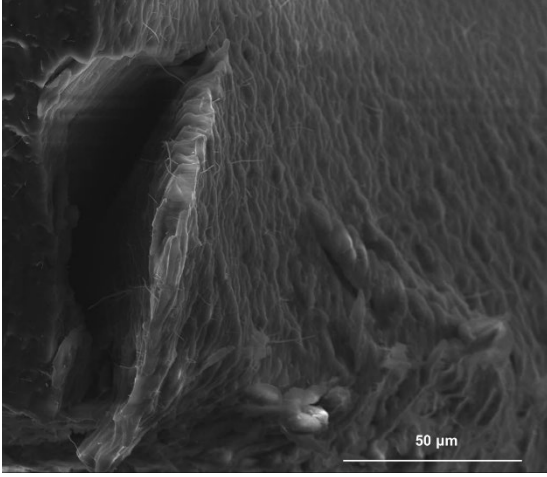

**Figure S3.** SEM image of HG<sub>NT</sub> sample after the five sorption cycles.

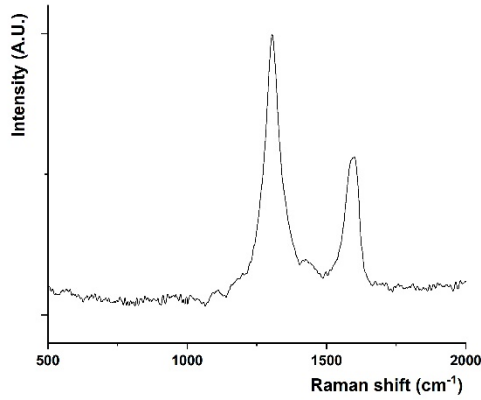

**Figure S4.** Raman patterns of HG<sub>NT</sub> sample after the five sorption cycles.

#### *Isothermal studies*

Isothermal studies were conducted employing Langmuir (Equation S1), Freundlich (Equation S2), Redlich-Peterson (Red-Pet, Equation S3), Sips (Equation S4), Dubinin-Radushkevich (Dub-Rad, Equation S5), and Temkin (Equation S6) models.

$$\text{Langmuir} \quad q_e = \frac{q_{max} k_L C_e}{1 + k_L C_e} \quad (\text{S1})$$

$$\text{Freundlich} \quad q_e = k_F C_e^{1/n_F} \quad (\text{S2})$$

$$\text{Red-Pet} \quad q_e = \frac{k_{RP} C_e}{1 + \alpha_{RP} C_e^g} \quad (\text{S3})$$

$$\text{Sips} \quad q_e = \frac{q_{max} k_s C_e^{n_s}}{1 + k_s C_e^{n_s}} \quad (\text{S4})$$

$$\text{Dub-Rad} \quad q_e = q_{max} e^{(-\beta_{DR} \epsilon)^2} \quad (\text{S5})$$

$$\text{Temkin} \quad q_e = B \ln(A_T C_e) \quad (\text{S6})$$

where  $q_{max}$  denotes maximum adsorption capacity of adsorbent ( $\text{mg g}^{-1}$ ),  $C_e$  the dye concentration at equilibrium ( $\text{mg L}^{-1}$ ),  $k_L$ ,  $k_F$ ,  $k_s$ , and  $A_T$  the Langmuir, Freundlich, Sips, and Temkin constants,  $n_F$  and  $n_s$  the Freundlich and the Sips exponents;  $k_{RP}$  and  $\alpha_{RP}$  the characteristic parameters of the Red-Pet isotherm,  $\beta_{DR}$  and  $\epsilon$  the activity and Polanyi coefficients of Dub-Rad isotherm.

The equilibrium parameter  $R_L$  of Langmuir model was calculated according to the Equation (S7):

$$R_L = \frac{1}{1+k_L C_0} \quad (S7)$$

The Specific Surface Area (SSA) was calculated according to the following equation (S8):

$$SSA = \frac{N_A A_D (C_0 - C_e) V}{M_D M_S} \quad (S8)$$

Where  $N_A$  is the Avodadro's number ( $6.023 \cdot 10^{23} \text{ mol}^{-1}$ ),  $A_D$  is the covered area per dye molecule,  $C_0$  and  $C_e$  the initial and equilibrium dyes concentration,  $V$  the volume of dyes solution used,  $M_D$  the relative molecular mass of dyes,  $M_S$  the mass of samples.

The sorption capacity  $q_{RP}$  of Red-Pet model was calculated according to the following equation (S9):

$$q_{RP} = \frac{k_{RP}}{\alpha_{RP}} \quad (S9)$$

Polanyi coefficients of Dub–Rad isotherm was calculated according to the following Equation (S10):

$$\varepsilon = RT \ln(1 + \frac{1}{C_e}) \quad (S10)$$

The apparent energy of adsorption mechanism (E) of Dub–Rad model was calculated according to the following equation (S11):

$$E = (2\beta)^{-1/2} \quad (S11)$$

The free energy of the sorption process (B) of Temkin model was calculated according to the following equation (S12):

$$B = \frac{RT}{b_T} \quad (S12)$$

Where  $b_T$  is a Temkin constant.

#### Kinetic studies

Kinetics studies were conducted using six models describing pseudo-first order (Equation S13), pseudo second-order (Equation S14), Avrami (Equation S15), fractional power (Equation S16), intraparticle diffusion (Equation S17), and Elovich (Equation S18) kinetics:

$$\text{Pseudo-first order} \quad q_t = q_e (1 - e^{-k_1 t}) \quad (S13)$$

$$\text{Pseudo-second order} \quad q_t = \frac{k_2 q_e^2 t}{1 + k_2 q_e t} \quad (S14)$$

$$\text{Avrami} \quad q_t = q_e [1 - e^{-(k_A t)^n}] \quad (S15)$$

$$\text{Fractional power} \quad q_t = k_p t^v \quad (S16)$$

$$\text{Intraparticle diffusion} \quad q_t = k_i t^{1/2} + C \quad (S17)$$

$$\text{Elovich} \quad q_t = \frac{1}{\beta} \ln(\alpha \beta t) \quad (S18)$$

with  $q_e$  being the adsorption capacity of adsorbent at equilibrium ( $\text{mg g}^{-1}$ ),  $k_1$ ,  $k_2$ ,  $k_A$ ,  $k_p$ , and  $k_i$  the kinetic constants of pseudo-first order, pseudo-second order, Avrami, fractional power, and intraparticle diffusion models,  $n$  and  $v$  the Avrami and fractional power exponents,  $\alpha$  and  $\beta$  imply the initial absorption and the desorption rates of Elovich model

$\chi^2$  values were calculated according to the following Equation (S19)

$$\chi^2 = \sum_{i=1}^n \frac{(q_{exp} - q_e)^2}{q_e} \times 100 \quad (S19)$$

#### Mean diameter of hydrogels pore

The mean diameters of hydrogels pore ( $\xi$ ) were determined by applying the empirical model proposed in the literature [37] according to the following Equation (S20):

$$\xi = 0.071 \phi^{-1/3} (\bar{M}_c)^{1/2} \quad (S20)$$

Here,  $\bar{M}_c$ , the molecular weight of the polymer chain between two neighbouring crosslinking points, is calculated according to Equation (S21):

$$\bar{M}_c = -d_p v_{m,1} \phi^{1/3} [\ln(1 - \phi) + \phi + \chi \phi^2]^{-1} \quad (\text{S21})$$

$v_{m,1}$  represents the molar volume of the swelling media, while  $\chi$  and  $\phi$  are the Flory–Huggins interaction parameter and the polymer volume fraction in the swollen state, respectively.

$\phi$  is calculated by following Equation (S22):

$$\phi = \left[ \left( \frac{d_p}{d_s} \right) \left( \frac{W_s - W_d}{W_d} \right) + 1 \right]^{-1} \quad (\text{S22})$$

$d_p$  and  $d_s$  are the densities of polymer and solvent;  $W_d$  and  $W_s$  the weight of polymer before and after 3 h swelling, respectively.

$\chi$  was calculated experimentally from the temperature coefficient of volume fraction ( $d\phi/dT$ ) according to Equation (S23):

$$\chi = [\phi(1 - \phi)^{-1} + N \ln(1 - \phi) + N\phi] \left[ 2\phi - \phi^2 N - \phi^2 T^{-1} \left( \frac{d\phi}{dT} \right)^{-1} \right]^{-1} \quad (\text{S23})$$

Here, ( $d\phi/dT$ ) is the slope obtained by plotting the volume fraction data versus temperature (in K), while N is calculated according to Equation (S24):

$$N = \left( \frac{\phi^{2/3}}{3} - \frac{2}{3} \right) \left( \phi^{1/3} - \frac{2}{3} \phi \right)^{-1} \quad (\text{S24})$$

#### *Batch kinetics and equilibrium adsorption studies*

The adsorption capacity at time t ( $q_t$ ) and at equilibrium ( $q_e$ ) were expressed using the following Equation (S25) and Equation (S26):

$$q_t = \frac{C_0 - C_t}{m} \times V \quad (\text{S25})$$

$$q_e = \frac{C_0 - C_e}{m} \times V \quad (\text{S26})$$
